# Supplementary material
Source: ML conference proceedings conference paper supplement (https://openaccess.thecvf.com/content/CVPR2025/html/Jose_DINOv2_Meets_Text_CVPR_2025_paper.html)
Supplement: Supplementary file 1 [file Jose_DINOv2_Meets_Text_CVPR_2025_supplemental.pdf]

## A. Additional details

**Computational cost.** In this work, we show that we can obtain good global and local vision-language alignment with minimal additional cost thanks to powerful pre-trained SSL models. This appears to be a more efficient paradigm than training CLIP from scratch. The computational costs for training our models and different CLIP models are reported in Table 7. For completeness’ sake, we also include the pretraining cost of the ViT-g DINOv2 vision encoder as well as the cost of distilling this model into a ViT-L. In practice, such additional costs should however be considered amortized over the multiple downstream adaptations of the DINOv2 backbone.

| Method                    | Samples seen | Batch size | GPUs | total GPU.h | GPU arch.  |
|---------------------------|--------------|------------|------|-------------|------------|
| CLIP                      | 12.8B        | 32768      | 256  | 73728       | V100       |
| OpenCLIP                  | 12.8B        | 38400      | 400  | 50800       | A100 40 GB |
| MetaCLIP                  | 12.8B        | 32768      | 128  | 92160       | V100       |
| EVA-02-CLIP               | 2B           | 61000      | 128  | –           | A100 40 GB |
| DINOv2 ViT-g pretraining  | –            | –          | 256  | 22000       | A100 80 GB |
| DINOv2 ViT-L distillation | –            | –          | –    | 8000        | A100 80 GB |
| dino.txt                  | 3.2B         | 65536      | 128  | 2432        | A100 80 GB |
| dino.txt @336             | 3.2B         | 65536      | 256  | 4096        | A100 80 GB |

Table 7. Computational cost of different models in GPU hours.

### ADE20K class names for the error analysis discussion.

In Section 4.5, we discuss the failure modes of our zero-shot semantic segmentation method. In particular, we show that class names can be optimized to boost results, instead of using the default ones from each dataset. This is not surprising, the 150 class names of ADE20K were originally chosen to identify each category and were not intended as holistic descriptors for zero-shot segmentation via a vision-language model. In our experiments, we have observed that some class names are too broad, e.g., *building*, or ambiguous, e.g., *throne*, and consequently result in incorrect predictions. In Table 11, we include the optimized class names for ADE20K that improve open-vocabulary segmentation by 2.1 mIoU points, as reported in the discussion about failure modes in Section 4.5. Please note that for all experiments in the main text, we use the original class names to facilitate comparison with previous work.

**Example of ambiguous training data.** We show in Figure 4 examples of poor image captions of our training data.

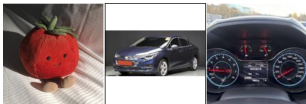

Figure 4. Examples of poor, ambiguous or too generic captions found in our data pool.

## B. Additional ablation studies

**Impact of the embedding in segmentation.** Table 8 presents open-vocabulary segmentation results on the challenging

datasets ADE20K and Cityscapes. We follow the evaluation protocol of TCL [13]. Following only MaskCLIP patch representation ([value]) leads to the worst results. Using solely the model’s output patch descriptor ([patch]) and their corresponding part in the text embedding leads to the best results. This is the setup used in the main paper. We also observe that concatenating the [CLS] token to the patch representation hurts the performance vs. [patch] only, particularly in Cityscapes: we found this to be due to the dominance of the salient visual concept in the [CLS].

| Inference embedding | segmentation |             |
|---------------------|--------------|-------------|
|                     | ADE          | City.       |
| [value] (MCLIP)     | 7.0          | 11.7        |
| [CLS patch]         | 19.9         | 26.2        |
| [value patch]       | 20.0         | 29.0        |
| [patch]             | <b>20.6</b>  | <b>32.1</b> |

Table 8. Ablation of the embedding in dense zero-shot segmentation inference. We show segmentation results with different embeddings to represent a patch, on the datasets ADE20K and Cityscapes. ‘MCLIP’ corresponds to MaskCLIP [103] strategy, which we also name here value.

### Impact of the image embedding size at training.

We show in Table 9 that the benefit of using the concatenated representation  $\mathbf{g}$  (noted here [CLS avg]) when training dino.txt does not come from higher dimensionality of the image embedding. To this end, we have conducted an additional experiment in which we project the [CLS] token from the dimension of 1024 to 2048 before passing it to the vision blocks. Little impact is observed from this dimensionality change. This additionally shows that the gain (from 30.9 to 34.7) in the retrieval task is largely due to the concatenation of the [CLS] token with [avg].

| Training embedding | proj        | class. IN1K | retr. COCO  |
|--------------------|-------------|-------------|-------------|
| [CLS]              |             | 78.8        | 30.2        |
| [CLS]              | 1024 → 2048 | 78.8        | 30.9        |
| [CLS avg]          |             | <b>79.2</b> | <b>34.7</b> |

Table 9. Analysis of the image embedding size at training time. Projecting the [CLS] embedding to dimension 2048 (second row) yields minimal gain on benchmarks.

**Impact of the trained layer.** In this project, we aimed to keep the backbone model as is, with no significant modifications that could alter DINOv2 feature qualities and its performance when considering diverse downstream tasks performed with a single frozen backbone. However, for completeness, we present here additional experiments with no extra block (‘none’), or the unfrozen last (two) block(s) (bottom rows). We observe that adding the extra blocks yields the best performance, particularly in segmentation tasks where high-quality localization features from DINOv2 are important. Moreover, unfreezing the last layers give

worst results than using the frozen backbone as is, likely due to a degradation of the quality of DINOv2’s features.

| Trained adapter  | IN1K        | COCO        | ADE         |
|------------------|-------------|-------------|-------------|
| two extra blocks | <b>81.4</b> | <b>45.4</b> | <b>20.6</b> |
| none             | 80.9        | 38.6        | 17.7        |
| last block       | 80.7        | 44.9        | 17.0        |
| two last blocks  | 80.6        | 44.4        | 13.7        |

Table 10. Analysis of the impact of the trained layer.

### C. Additional qualitative results

**Open-vocabulary semantic segmentation.** Figures 5-6 demonstrate that the segmentation results of `dino.txt` with images and texts in the wild. For each image, we select a small number of descriptive text prompts and run the zero-shot semantic segmentation pipeline described in Section 4.4. Our model is able to segment complex scenes with multiple semantic objects and specific text inputs, *e.g.*, “pesto bruschetta” and “nautical rope”.

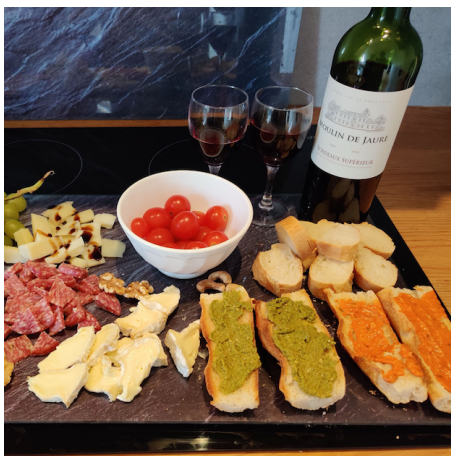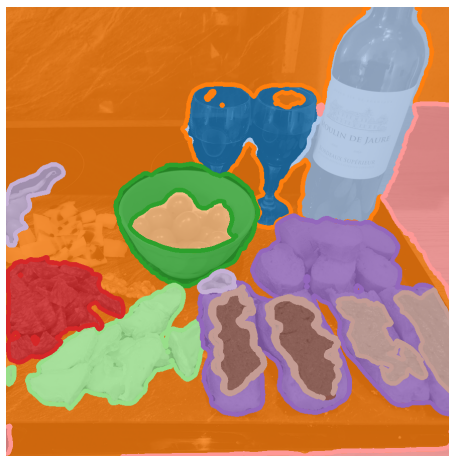

| Color        | Name                       |
|--------------|----------------------------|
| Blue         | Wine glass                 |
| Light blue   | Wine bottle                |
| Orange       | Stone cutting board        |
| Light orange | Cherry tomatoes            |
| Green        | White ceramic bowl         |
| Light green  | French cheese              |
| Red          | Salami slices              |
| Pink         | Wooden table               |
| Purple       | Sliced baguette            |
| Light purple | Green grapes               |
| Brown        | Pesto bruschetta           |
| Light brown  | Red pepper spread on bread |

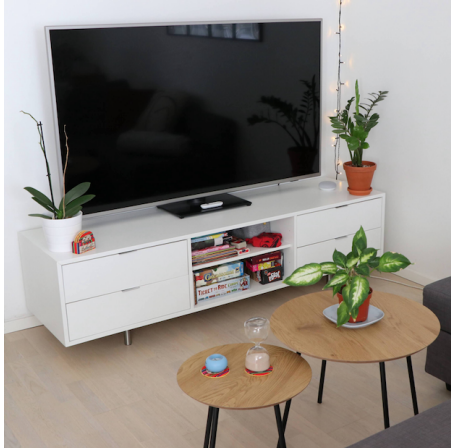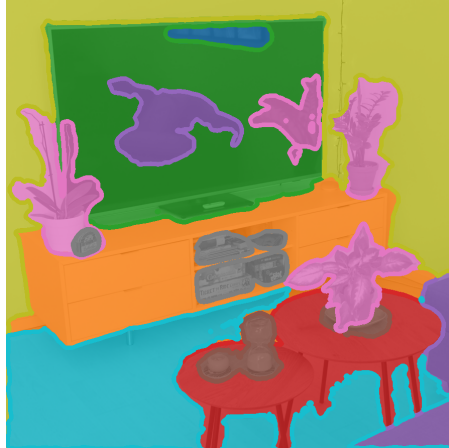

| Color       | Name                    |
|-------------|-------------------------|
| Blue        | Window                  |
| Orange      | White cabinet           |
| Green       | Black television screen |
| Red         | Wooden sofa table       |
| Purple      | Gray couch              |
| Brown       | Candle                  |
| Pink        | Potted plant            |
| Gray        | Books                   |
| Light green | Indoor wall             |
| Cyan        | Parquet floor           |

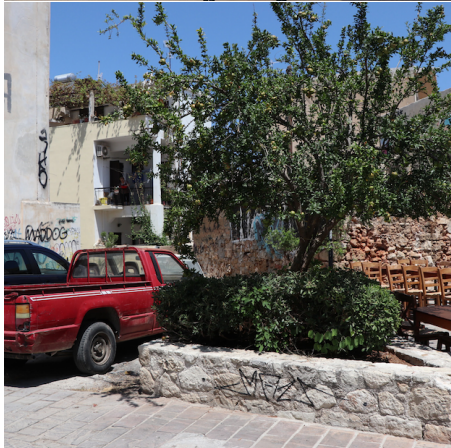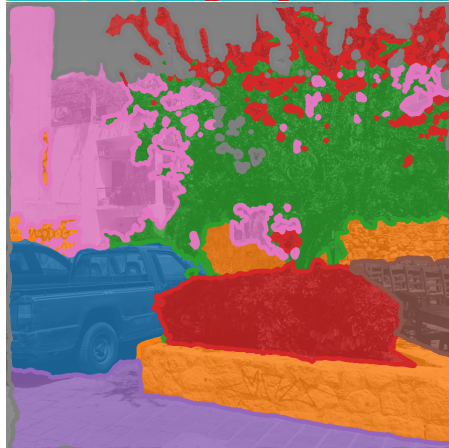

| Color  | Name             |
|--------|------------------|
| Blue   | Red pickup truck |
| Orange | Stone wall       |
| Green  | Lush tree        |
| Red    | Bush             |
| Purple | Paved road       |
| Brown  | Chair            |
| Pink   | Facade           |
| Gray   | Blue sky         |

Figure 5. Open-vocabulary semantic segmentation, part 1/2. The input resolution is 896×896 pixels.



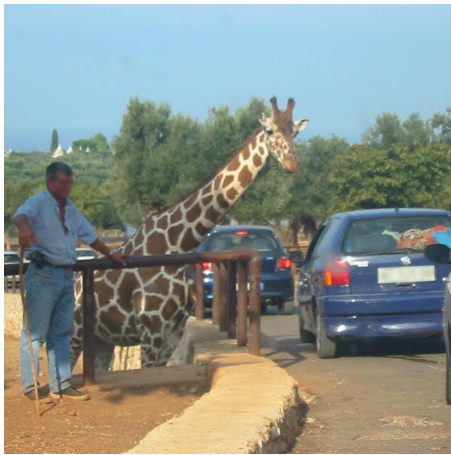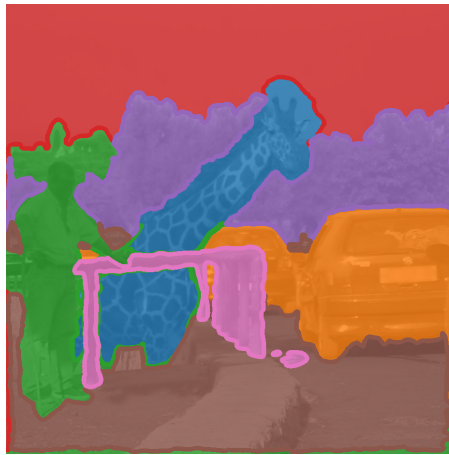

| Color  | Name                          |
|--------|-------------------------------|
| Blue   | Tall giraffe                  |
| Orange | Blue automobile               |
| Green  | Tanned man in shirt and pants |
| Red    | Open sky                      |
| Purple | Trees, bushes                 |
| Brown  | Dirt road, sandy ground       |
| Pink   | Wood railing, fence           |

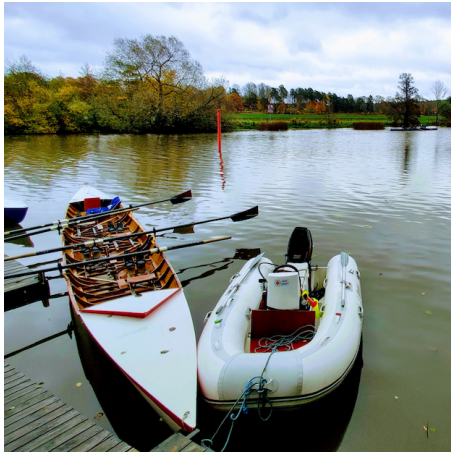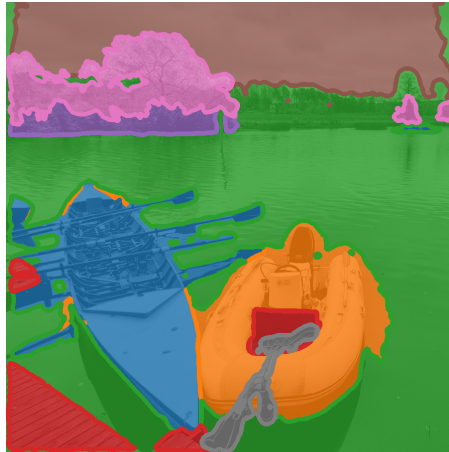

| Color  | Name                  |
|--------|-----------------------|
| Blue   | Wood rowing canoe     |
| Orange | Inflatable motor boat |
| Green  | Peaceful lake         |
| Red    | Wooden pier           |
| Purple | Bush                  |
| Blue   | Blue sky              |
| Pink   | Tree                  |
| Grey   | Nautical rope         |

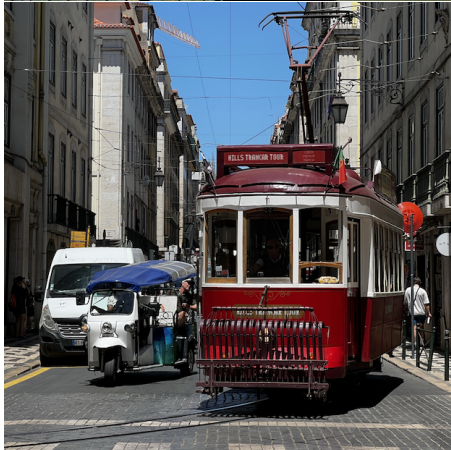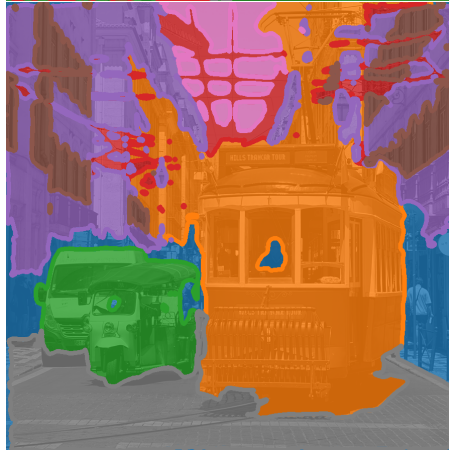

| Color  | Name           |
|--------|----------------|
| Blue   | Pedestrian     |
| Orange | Tram           |
| Green  | Car            |
| Red    | Electric wires |
| Purple | Facade         |
| Brown  | Window         |
| Pink   | Open sky       |
| Grey   | Road, pavement |

Figure 6. Open-vocabulary semantic segmentation, part 2/2. The input resolution is  $896 \times 896$  pixels.



| Original                                                                                                          | Optimized                                                 | Original                                                                                            | Optimized                                                                                           |
|-------------------------------------------------------------------------------------------------------------------|-----------------------------------------------------------|-----------------------------------------------------------------------------------------------------|-----------------------------------------------------------------------------------------------------|
| wall                                                                                                              | wall                                                      | swivel chair                                                                                        | swivel chair                                                                                        |
| building, edifice                                                                                                 | facade, frontage, frontal                                 | boat                                                                                                | boat                                                                                                |
| sky                                                                                                               | floor                                                     | bar                                                                                                 | bar                                                                                                 |
| floor, flooring                                                                                                   | sky                                                       | arcade machine                                                                                      | arcade machine                                                                                      |
| ceiling                                                                                                           | ceiling                                                   | air conditioner                                                                                     | air conditioner                                                                                     |
| road, route                                                                                                       | road                                                      | bus                                                                                                 | bus                                                                                                 |
| bed                                                                                                               | bed                                                       | taxi                                                                                                | taxi                                                                                                |
| winduppane window                                                                                                 | window pane                                               | truck, motor truck                                                                                  | truck, motor truck                                                                                  |
| grass                                                                                                             | grass                                                     | tower                                                                                               | tower                                                                                               |
| park                                                                                                              | park                                                      | air conditioner                                                                                     | air conditioner                                                                                     |
| sidewalk, pavement                                                                                                | sidewalk, pavement                                        | awning                                                                                              | awning                                                                                              |
| person, individual, someone, somebody, mortal, soul                                                               | people                                                    | streetlight                                                                                         | streetlight                                                                                         |
| earth, ground                                                                                                     | ground, earth                                             | newsstand                                                                                           | newsstand                                                                                           |
| door, double door                                                                                                 | interior door                                             | television receiver                                                                                 | television receiver                                                                                 |
| table, table, resonant                                                                                            | table                                                     | airplane                                                                                            | airplane                                                                                            |
| plant, flora, plant life                                                                                          | herb                                                      | clothes closet, clothespress                                                                        | clothes closet, clothespress                                                                        |
| curtain, draps, drapery, mantle, pall                                                                             | curtain                                                   | pole                                                                                                | pole                                                                                                |
| car, auto, automobile, machine, motorcar                                                                          | car                                                       | land                                                                                                | land                                                                                                |
| chair                                                                                                             | chair                                                     | bummer, banister, balustrade, balusters, handrail                                                   | bummer, banister, balustrade, balusters, handrail                                                   |
| sofa, couch, lounge                                                                                               | sofa, couch, lounge                                       | escalator, moving staircase, moving stairway                                                        | escalator, moving staircase, moving stairway                                                        |
| parlor, picture                                                                                                   | parlor                                                    | bottle                                                                                              | bottle                                                                                              |
| shelf                                                                                                             | shelf                                                     | bullet, counter, sideboard                                                                          | bullet, counter, sideboard                                                                          |
| house                                                                                                             | house                                                     | poster, posting, placard, notice, bill, card                                                        | poster, posting, placard, notice, bill, card                                                        |
| sea                                                                                                               | sea                                                       | stage                                                                                               | stage                                                                                               |
| river                                                                                                             | river                                                     | ship                                                                                                | ship                                                                                                |
| tug, carpet, carpeting                                                                                            | tug                                                       | fountain                                                                                            | fountain                                                                                            |
| field                                                                                                             | field                                                     | conveyor belt, conveyor, transporter                                                                | conveyor belt, conveyor, transporter                                                                |
| armchair                                                                                                          | armchair                                                  | canopy                                                                                              | canopy                                                                                              |
| seat                                                                                                              | seat                                                      | washer, automatic washer, washing machine                                                           | washer, automatic washer, washing machine                                                           |
| fence, fencing                                                                                                    | fence                                                     | swimming pool, swimming bath, natatorium                                                            | swimming pool, swimming bath, natatorium                                                            |
| lock, nose                                                                                                        | lock                                                      | barrel, cask                                                                                        | barrel, cask                                                                                        |
| wardrobe, closet, press                                                                                           | wardrobe                                                  | basket                                                                                              | basket                                                                                              |
| lamp                                                                                                              | lamp                                                      | waterfall                                                                                           | waterfall                                                                                           |
| bath tub, bathing tub, bath, tub                                                                                  | bath tub                                                  | bag                                                                                                 | bag                                                                                                 |
| bathtub, bathtub, tub, bath, tub                                                                                  | bathtub                                                   | compact, shaver                                                                                     | compact, shaver                                                                                     |
| ring, ring, rail                                                                                                  | ring                                                      | mini-bike, motorbike                                                                                | mini-bike, motorbike                                                                                |
| base, pedestal, stand                                                                                             | base, pedestal, stand                                     | box                                                                                                 | box                                                                                                 |
| column, pillar                                                                                                    | column                                                    | oven                                                                                                | oven                                                                                                |
| signboard, sign                                                                                                   | signboard                                                 | boat, solid food                                                                                    | boat, solid food                                                                                    |
| chest of drawers, chest, bureau, dresser                                                                          | chest of drawers                                          | step, stair                                                                                         | step, stair                                                                                         |
| desk                                                                                                              | desk                                                      | sketch                                                                                              | sketch                                                                                              |
| sand                                                                                                              | sand                                                      | tank, storage tank                                                                                  | tank, storage tank                                                                                  |
| sink                                                                                                              | sink                                                      | trade name, brand name, brand, marque                                                               | trade name, brand name, brand, marque                                                               |
| sky scraper                                                                                                       | skyscraper                                                | microwave, microwave oven                                                                           | microwave, microwave oven                                                                           |
| fireplace, hearth, open fireplace                                                                                 | fireplace, hearth, open fireplace                         | pot, cooking pot, pot, pot, cooking pot                                                             | pot, cooking pot, pot, pot, cooking pot                                                             |
| refrigerator, kitchen                                                                                             | refrigerator                                              | toy, toy                                                                                            | toy, toy                                                                                            |
| table, desk, covered stand                                                                                        | table, desk, covered stand                                | pedestal, plinth, footstall                                                                         | pedestal, plinth, footstall                                                                         |
| path                                                                                                              | path                                                      | microwave                                                                                           | microwave                                                                                           |
| stairs, steps                                                                                                     | stairs                                                    | animal                                                                                              | animal                                                                                              |
| case, display case, showcase, vitrine                                                                             | case, display case, showcase, vitrine                     | bicycle                                                                                             | bicycle                                                                                             |
| table, table, billiard table, snooker table                                                                       | table, table, billiard table, snooker table               | lake                                                                                                | lake                                                                                                |
| pillow                                                                                                            | pillow                                                    | dishwasher                                                                                          | dishwasher                                                                                          |
| screen door, screen                                                                                               | screen door, screen                                       | screen                                                                                              | screen                                                                                              |
| stairway, staircase                                                                                               | stairway, staircase                                       | television set, television                                                                          | television set, television                                                                          |
| river                                                                                                             | river                                                     | range hood                                                                                          | range hood                                                                                          |
| bridge, span                                                                                                      | bridge, span                                              | vase                                                                                                | vase                                                                                                |
| blinds, window blinds                                                                                             | blinds, window blinds                                     | traffic light                                                                                       | traffic light                                                                                       |
| blind, screen                                                                                                     | blind, screen                                             | askan, trash can, garbage can, wastebin, ash bin, ashbin, dustbin, dustbin, trash barrel, trash bin | askan, trash can, garbage can, wastebin, ash bin, ashbin, dustbin, dustbin, trash barrel, trash bin |
| coffee table, cocktail table                                                                                      | coffee table, cocktail table                              | pier, wharf, wharfage, dock                                                                         | pier, wharf, wharfage, dock                                                                         |
| toilet, can, commode, crapper, pot, potty, stool, throne                                                          | toilet, can, commode, crapper, pot, potty, stool, throne  | bulletin board, notice board                                                                        | bulletin board, notice board                                                                        |
| flower                                                                                                            | flower                                                    | shower                                                                                              | shower                                                                                              |
| bill                                                                                                              | bill                                                      | radiator                                                                                            | radiator                                                                                            |
| bench                                                                                                             | bench                                                     | clock                                                                                               | clock                                                                                               |
| countertop                                                                                                        | countertop                                                | glass, drinking glass                                                                               | glass, drinking glass                                                                               |
| stove, kitchen stove, range, kitchen range, cooking stove                                                         | stove, kitchen stove, range, kitchen range, cooking stove | flag                                                                                                | flag                                                                                                |
| patio, patio tree                                                                                                 | patio, patio tree                                         |                                                                                                     |                                                                                                     |
| kitchen island                                                                                                    | kitchen island                                            |                                                                                                     |                                                                                                     |
| computer, computing machine, computing device, data processor, electronic computer, information processing system | desktop computer                                          |                                                                                                     |                                                                                                     |

Table 11. ADE20K dataset: original class names vs. optimized class names for zero-shot semantic segmentation. Modified class names are highlighted in bold. The new class names have been picked through manual analysis to increase specificity, for example *building* to *facade*, or to remove potential confusion, for example *throne* for *toilet*.
